# Supplementary material for: Predicting Retention Times of Naturally Occurring Phenolic Compounds in Reversed-Phase Liquid Chromatography: A Quantitative Structure-Retention Relationship (QSRR) Approach
Source: Int J Mol Sci. 2012 Nov 20;13(11):15387–400. doi: 10.3390/ijms131115387 (PMC3509648; doi:10.3390/ijms131115387)
Supplement: Supplementary file 1 [file ijms-13-15387-s001.pdf]

## Supplementary Materials

**Table S1.** Values of descriptors selected in SMLR and UFS-SMLR models.

| Sr. No. | Compound                    | HNar  | GATS2v | DISPe | Mor32e | Mp    | IDM   | DISPm | Mor22v | Mor28e |
|---------|-----------------------------|-------|--------|-------|--------|-------|-------|-------|--------|--------|
| 1       | Gallic acid                 | 1.565 | 1.177  | 0.065 | −0.351 | 0.640 | 5.878 | 2.477 | −0.025 | 0.126  |
| 2       | Gentisic acid               | 1.610 | 1.168  | 0.374 | −0.304 | 0.650 | 5.624 | 6.421 | −0.073 | −0.093 |
| 3       | Protocatechuic acid         | 1.610 | 1.168  | 0.210 | −0.253 | 0.650 | 5.606 | 4.129 | −0.032 | −0.068 |
| 4       | Salicylic acid              | 1.667 | 1.157  | 0.464 | −0.151 | 0.670 | 5.339 | 6.808 | −0.035 | −0.130 |
| 5       | Syringic acid               | 1.615 | 0.668  | 0.066 | −0.155 | 0.630 | 6.341 | 1.995 | −0.072 | −0.228 |
| 6       | Vanillic acid               | 1.636 | 0.859  | 0.144 | −0.168 | 0.640 | 5.867 | 4.871 | −0.046 | −0.117 |
| 7       | 2,4-Dihydroxybenzoic acid   | 1.610 | 1.168  | 0.238 | −0.212 | 0.650 | 5.613 | 3.879 | −0.082 | −0.048 |
| 8       | 3-Methoxybenzoic acid       | 1.692 | 0.850  | 0.306 | −0.090 | 0.650 | 5.603 | 5.865 | −0.038 | −0.151 |
| 9       | 4-Hydroxybenzoic acid       | 1.667 | 1.157  | 0.186 | −0.231 | 0.670 | 5.306 | 3.998 | −0.058 | −0.031 |
| 10      | Caffeic acid                | 1.660 | 1.205  | 0.160 | −0.301 | 0.660 | 6.060 | 2.939 | −0.009 | −0.161 |
| 11      | Chlorogenic acid            | 1.676 | 1.278  | 0.264 | −0.488 | 0.630 | 7.975 | 2.307 | −0.015 | −0.421 |
| 12      | Ferulic acid                | 1.680 | 0.946  | 0.287 | −0.114 | 0.650 | 6.286 | 6.828 | −0.047 | −0.283 |
| 13      | <i>m</i> -Coumaric acid     | 1.714 | 1.196  | 0.336 | −0.226 | 0.670 | 5.825 | 5.429 | −0.020 | −0.078 |
| 14      | <i>o</i> -Coumaric acid     | 1.714 | 1.196  | 0.499 | −0.245 | 0.670 | 5.835 | 6.865 | −0.091 | −0.062 |
| 15      | <i>p</i> -Coumaric acid     | 1.714 | 1.196  | 0.272 | −0.256 | 0.670 | 5.810 | 3.809 | −0.066 | −0.030 |
| 16      | Sinapic acid                | 1.655 | 0.773  | 0.210 | −0.112 | 0.640 | 6.701 | 5.944 | −0.080 | −0.267 |
| 17      | <i>trans</i> -Cinnamic acid | 1.784 | 1.186  | 0.504 | −0.170 | 0.680 | 5.560 | 6.354 | 0.011  | −0.147 |
| 18      | Dihydrocaffeic acid         | 1.660 | 1.259  | 0.205 | −0.397 | 0.640 | 6.060 | 2.890 | 0.042  | −0.169 |
| 19      | Homovanillic acid           | 1.660 | 0.960  | 0.168 | −0.196 | 0.640 | 6.085 | 5.035 | −0.082 | −0.016 |
| 20      | DOPAC                       | 1.636 | 1.222  | 0.040 | −0.394 | 0.640 | 5.842 | 0.416 | −0.086 | −0.071 |
| 21      | 4-hydroxyphenylacetic acid  | 1.692 | 1.207  | 0.255 | −0.343 | 0.650 | 5.569 | 2.793 | −0.077 | 0.105  |
| 22      | Ellagic acid                | 1.833 | 0.869  | 0.001 | −0.135 | 0.710 | 7.684 | 0.027 | 0.138  | 0.164  |
| 23      | Vanillin                    | 1.692 | 0.817  | 0.099 | −0.115 | 0.650 | 5.607 | 4.086 | −0.055 | −0.109 |
| 24      | Tyrosol                     | 1.765 | 1.169  | 0.077 | −0.201 | 0.640 | 5.283 | 4.618 | −0.008 | −0.145 |

**Table S1.** *Cont.*

| <b>Sr. No.</b> | <b>Compound</b>                 | <b>HNar</b> | <b>GATS2v</b> | <b>DISPe</b> | <b>Mor32e</b> | <b>Mp</b> | <b>IDM</b> | <b>DISPm</b> | <b>Mor22v</b> | <b>Mor28e</b> |
|----------------|---------------------------------|-------------|---------------|--------------|---------------|-----------|------------|--------------|---------------|---------------|
| 25             | Apigenin                        | 1.875       | 1.061         | 0.220        | −0.501        | 0.700     | 7.347      | 3.675        | −0.141        | 0.158         |
| 26             | Chrysin                         | 1.932       | 1.057         | 0.458        | −0.347        | 0.710     | 7.208      | 6.346        | −0.093        | −0.003        |
| 27             | Luteolin                        | 1.826       | 1.064         | 0.141        | −0.481        | 0.690     | 7.493      | 2.822        | −0.150        | −0.047        |
| 28             | Luteolin-7- <i>O</i> -glucoside | 1.811       | 1.131         | 0.115        | −0.605        | 0.650     | 8.709      | 5.401        | −0.072        | −0.209        |
| 29             | Kaempferide                     | 1.833       | 0.901         | 0.377        | −0.350        | 0.680     | 7.626      | 8.482        | −0.138        | −0.259        |
| 30             | Myricetin                       | 1.747       | 1.070         | 0.149        | −0.596        | 0.680     | 7.774      | 2.566        | −0.108        | 0.157         |
| 31             | Quercetin                       | 1.784       | 1.067         | 0.133        | −0.680        | 0.690     | 7.641      | 3.152        | −0.111        | −0.095        |
| 32             | Rutin                           | 1.779       | 1.165         | 0.135        | −0.631        | 0.630     | 9.590      | 6.790        | −0.115        | 0.182         |
| 33             | Hesperidin                      | 1.804       | 1.116         | 0.168        | −0.148        | 0.620     | 9.554      | 5.027        | −0.174        | −0.440        |
| 34             | Isosakuranetin                  | 1.881       | 0.949         | 0.345        | −0.387        | 0.670     | 7.478      | 8.139        | −0.100        | −0.306        |
| 35             | Naringenin                      | 1.875       | 1.094         | 0.204        | −0.652        | 0.680     | 7.347      | 3.722        | −0.207        | −0.069        |
| 36             | (+)-Catechin                    | 1.826       | 1.137         | 0.115        | −0.405        | 0.660     | 7.495      | 1.878        | 0.001         | −0.557        |
| 37             | (−)-Epicatechin                 | 1.826       | 1.137         | 0.082        | −0.315        | 0.660     | 7.495      | 1.225        | −0.014        | −0.364        |
| 38             | Genistein                       | 1.875       | 0.996         | 0.169        | −0.623        | 0.700     | 7.347      | 2.274        | −0.178        | −0.062        |
| 39             | (+)-Taxifolin                   | 1.784       | 1.111         | 0.096        | −0.359        | 0.670     | 7.641      | 2.375        | −0.047        | −0.177        |
